# Instructions for Obtaining ANESTHESIOLOGY Continuing Medical Education (CME) Credit

CME Editors: Leslie C. Jameson, M.D., and Dan J. Kopacz, M.D.

ANESTHESIOLOGY's Journal CME is open to all readers. To take part in ANESTHESIOLOGY Journal-based CME, complete the following steps:

1. Read the CME information presented on this page.
2. Read this month's article designated for CME credit (listed below) in either the print or online edition.
3. Register at <http://www.asahq.org/shop-asahq/journal-cme>. Nonmembers will be asked to provide payment.
4. Achieve a score of at least 50% correct on the six-question online journal CME quiz and complete the evaluation.
5. Claim credit in 15-minute increments, for a maximum of 1 *AMA PRA Category 1 Credit*™ per journal article.

## CME Information & Disclosure

**Purpose:** The focus of ANESTHESIOLOGY Journal-based CME is to educate readers on current developments in the science and clinical practice of anesthesiology.

**Target Audience:** ANESTHESIOLOGY Journal-based CME is intended for anesthesiologists. Researchers and other health care professionals with an interest in anesthesiology may also participate.

**Accreditation:** The American Society of Anesthesiologists is accredited by the Accreditation Council for Continuing Medical Education to provide continuing medical education for physicians.

**CME Designation Statement:** The American Society of Anesthesiologists designates this Journal-based CME activity for a maximum of 1 *AMA PRA Category 1 Credit*™. Physicians should claim only the credit commensurate with the extent of their participation in the activity.

## Rates

Two options are available:

|            | ASA Member | Non-member |
|------------|------------|------------|
| Annual Fee | \$0        | \$120      |
| Per Issue  | \$0        | \$20       |

Payment may be made using Visa or MasterCard.

Please direct any questions about Journal-based CME to: [EducationCenter@asahq.org](mailto:EducationCenter@asahq.org)

**Date of Release:** June 2018

**Termination Date:** June 2021

## This Month's ANESTHESIOLOGY Journal-based CME Article

Read the article by Wasserman *et al.* entitled "Impact of Intravenous Acetaminophen on Perioperative Opioid Utilization and Outcomes in Open Colectomies: A Claims Database Analysis" on page 77.

## Learning Objectives

After successfully completing this activity, the learner will be able to explain the clinical utility of intravenous or oral acetaminophen formulations, discuss the methods used to measure the effects of nonopioid drugs on opioid requirements, and advise patients regarding their choices of nonopioid analgesics during their hospitalization.

## Disclosures

This journal article has been selected for and planned as a journal CME activity, which is designated for *AMA PRA Category 1 Credit*. The authors disclosed relationships in keeping with ANESTHESIOLOGY's requirements for all journal submissions. All relationships journal authors disclosed to ANESTHESIOLOGY are disclosed to learners, even those relationships that are not relevant financial relationships, per the ACCME's requirements for CME activities.

**Editor-in-Chief:** Evan D. Kharasch, M.D., Ph.D., has reported receiving consulting fees from TEN Healthcare.

**CME Editors:** Leslie C. Jameson, M.D., has reported no relevant financial relationships with commercial interests. Dan J. Kopacz, M.D., has reported holding an equity position with SoloDex, LLC.

**Authors:** Isaac Wasserman, M.P.H.; Jashvant Poeran, M.D., Ph.D.; Nicole Zubizarreta, M.P.H.; Jason Babby, Pharm.D., B.C.P.S.; Stelian Serban, M.D.; Andrew T. Goldberg, M.D.; Alexander J. Greenstein, M.D.; and Madhu Mazumdar, Ph.D., disclosed no relevant financial relationships with commercial interests. Stavros G. Memtsoudis, M.D., Ph.D., disclosed receiving funding from HappyMed, Austria. Andrew B. Leibowitz, M.D., disclosed being on the medical advisory board for ELCAM and OEM Company.

## Resolution of Conflicts of Interest

In accordance with the ACCME Standards for Commercial Support of CME, the American Society of Anesthesiologists has implemented mechanisms, prior to the planning and implementation of this Journal-based CME activity, to identify and resolve conflicts of interest for all individuals in a position to control content of this Journal-based CME activity.

## Disclaimer

The information provided in this CME activity is for continuing education purposes only and is not meant to substitute for the independent medical judgment of a health care provider relative to diagnostic and treatment options of a specific patient's medical condition.
